# Supplementary material for: Wide spectrum responsive CdS/NiTiO3/CoS with superior photocatalytic performance for hydrogen evolution
Source: Royal Society of Chemistry journal article supplement (doi:10.1039/c7cy00476a), 2017-01-01

## Wide Spectrum Responsive CdS/NiTiO<sub>3</sub>/CoS with Superior Photocatalytic Performance for Hydrogen Evolution

*Zhaoyu Wang, Junwen Peng, Xue Feng, Zhengxin Ding\* and Zhaohui Li\**

*Research Institute of Photocatalysis, State Key Laboratory of Photocatalysis on Energy and Environment, College of Chemistry, Fuzhou University, Fuzhou 350002, PR China*

---

\* Corresponding authors.

E-mail: [zhaohuili1969@yahoo.com](mailto:zhaohuili1969@yahoo.com)(Z. Li); [zxding@fzu.edu.cn](mailto:zxding@fzu.edu.cn) (Z. Ding).

**Fig. S1** TEM image of NiTiO<sub>3</sub> nanorods.

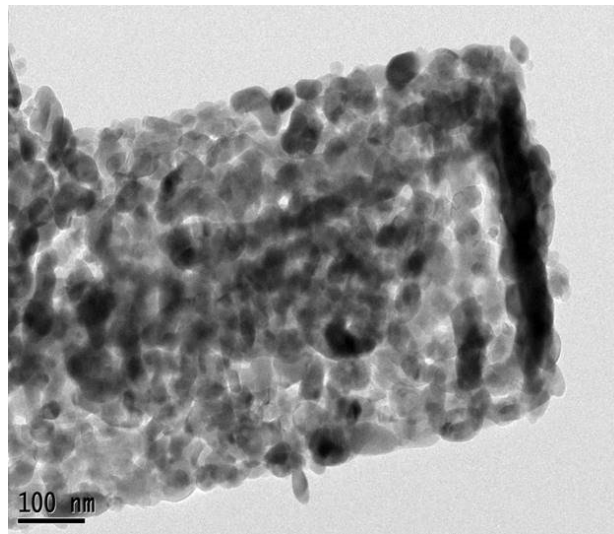

**Fig. S2** TEM image of CdS nanoparticle

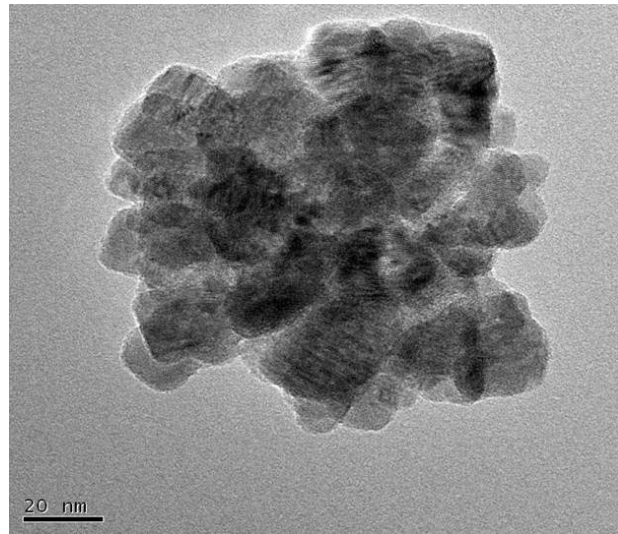

**Fig. S3** EDX spectrum of CdS/NiTiO<sub>3</sub>/CoS.

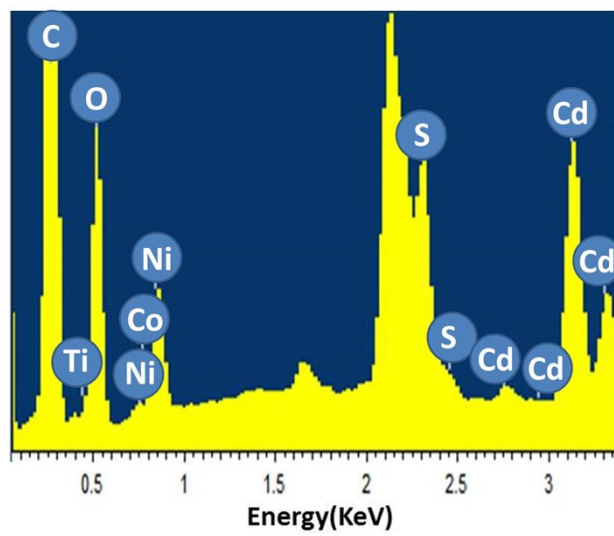

**Fig. S4** XPS spectra of CdS (a) S 2p, (b) Cd 3d; NiTiO<sub>3</sub> (c) Ni 2p, (d) Ti 2p, (e) O 1s; CdS/NiTiO<sub>3</sub>/CoS nanocomposite (f) Cd 3d, (g) Ti 2p, (h) O 1s.

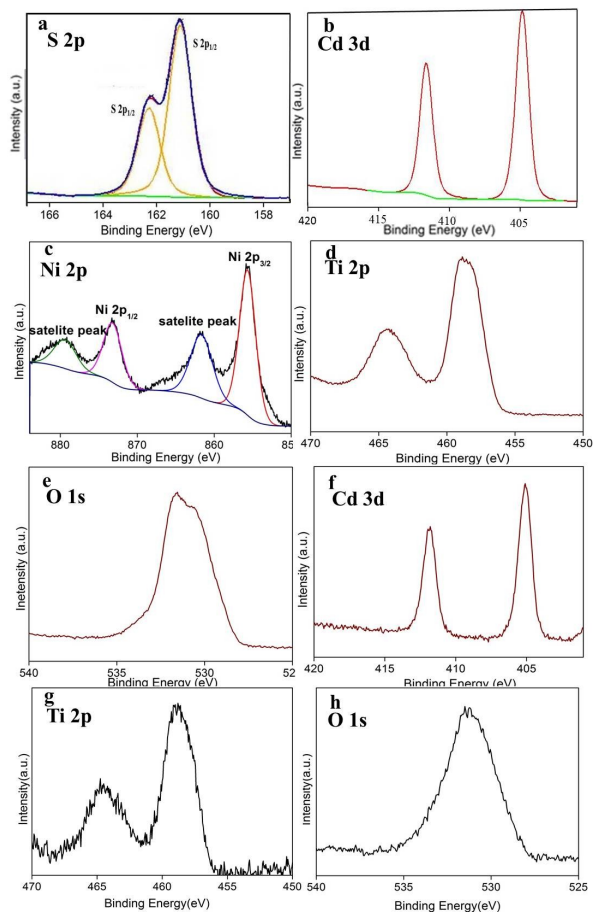

**Fig. S5** Nitrogen adsorption-desorption isotherm of the CdS/NiTiO<sub>3</sub>/CoS nanocomposite. The inset shows the corresponding pore size distribution plot.

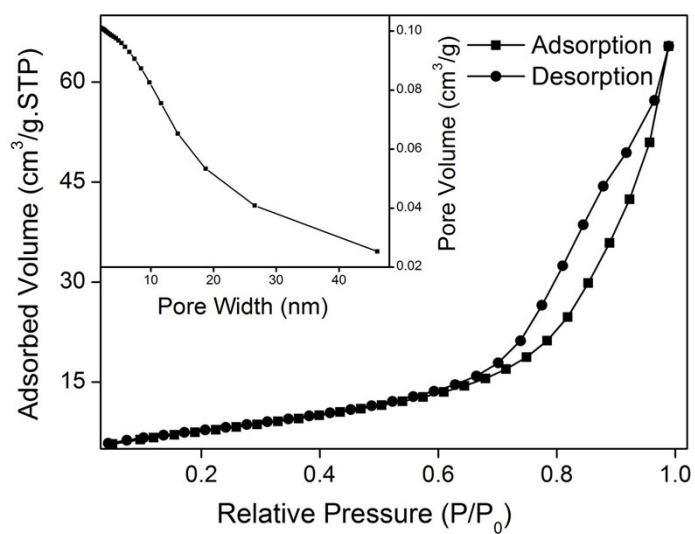

**Fig. S6** (a) The amount of H<sub>2</sub> evolved over the CdS/NiTiO<sub>3</sub>/CoS nanocomposite under irradiation of the Xe lamp equipped with band pass of 435, 520, 650 and 760nm; (b) The UV-vis absorption of CdS/NiTiO<sub>3</sub>/CoS nanocomposite.

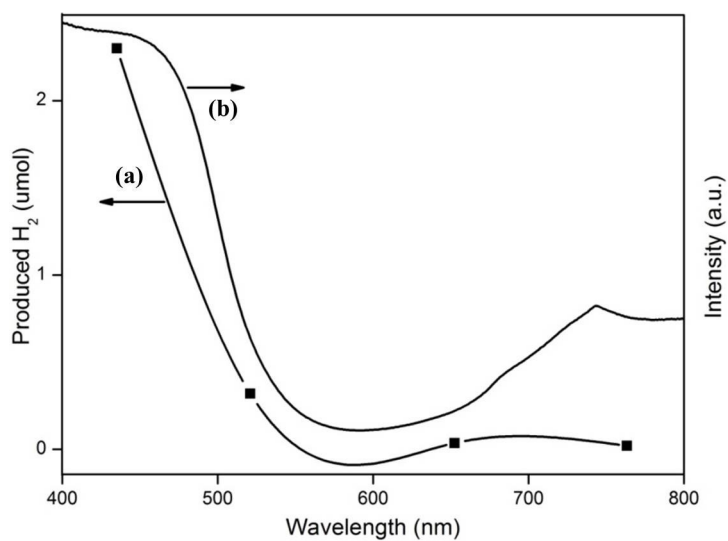

**Fig. S7** XRD patterns of CdS sample before (a) and after (b) the photocatalysis, respectively.

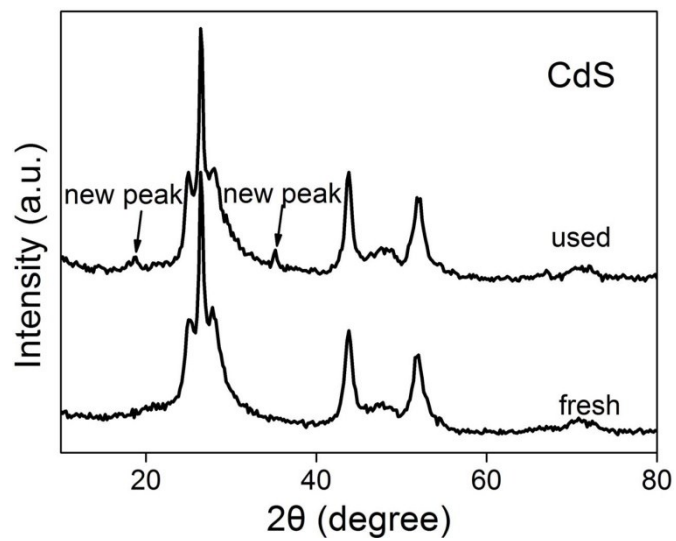



**Fig. S8** XRD patterns of CdS/NiTiO<sub>3</sub>/CoS sample before (a) and after (b) the photocatalysis, respectively.

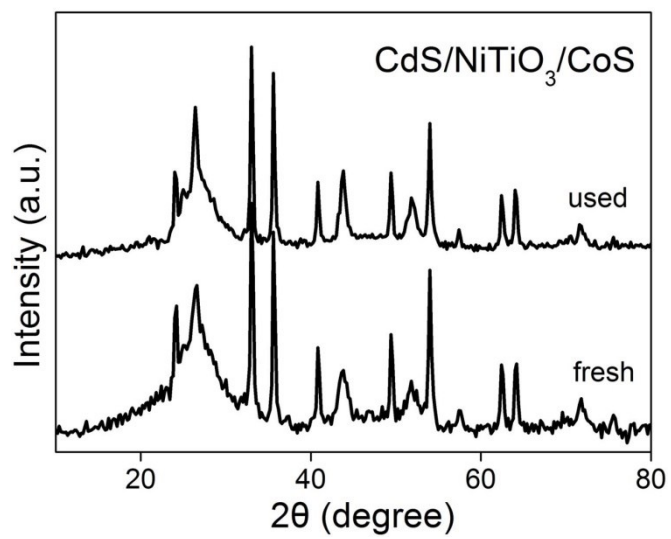

Supplement: c7cy00476a1.pdf [file c7cy00476a1.pdf]
